# Supplementary material for: Identification of QTN and Candidate Gene for Seed-flooding Tolerance in Soybean [Glycine max (L.) Merr.] using Genome-Wide Association Study (GWAS)
Source: PubMed Central journal article supplement (PMC6947551; doi:10.3390/genes10120957), 2019-11-21
Supplement: genes-10-00957-s001.pdf [file genes-10-00957-s001.pdf]

**Table S1.** List of 347 soybean lines and the evaluation of GR, NSR and EC in two environments JP14 and HY15.

| lines | JP14 |      |      | lines | JP14 |      |      |
|-------|------|------|------|-------|------|------|------|
|       | GR   | NSR  | EC   |       | GR   | NSR  | EC   |
| L001  | 0.23 | 0.13 | 1024 | L319  | 0.96 | 0.90 | 793  |
| L002  | 0.26 | 0.15 | 1544 | L320  | 0.92 | 0.84 | 1087 |
| L004  | 0.70 | 0.55 | 1215 | L322  | 0.27 | 0.14 | 1225 |
| L005  | 0.30 | 0.17 | 1163 | L323  | 0.27 | 0.10 | 1579 |
| L006  | 0.43 | 0.35 | 1180 | L324  | 0.74 | 0.53 | 1209 |
| L007  | 0.52 | 0.46 | 1379 | L325  | 0.70 | 0.51 | 772  |
| L008  | 0.50 | 0.24 | 1124 | L326  | 0.36 | 0.34 | 1069 |
| L009  | 0.55 | 0.36 | 1393 | L327  | 0.21 | 0.13 | 1320 |
| L010  | 0.43 | 0.21 | 1048 | L328  | 0.90 | 0.63 | 1089 |
| L014  | 0.29 | 0.21 | 1238 | L329  | 0.68 | 0.38 | 962  |
| L015  | 0.67 | 0.46 | 906  | L332  | 0.52 | 0.25 | 1310 |
| L016  | 0.95 | 0.88 | 745  | L334  | 0.67 | 0.23 | 1199 |
| L018  | 0.96 | 0.90 | 154  | L336  | 0.66 | 0.47 | 931  |
| L019  | 0.65 | 0.44 | 1241 | L338  | 0.52 | 0.50 | 2315 |
| L022  | 0.82 | 0.79 | 1088 | L340  | 0.72 | 0.69 | 958  |
| L023  | 0.69 | 0.49 | 1027 | L344  | 0.59 | 0.27 | 658  |
| L024  | 0.02 | 0.00 | 2078 | L347  | 0.71 | 0.39 | 616  |
| L026  | 0.14 | 0.13 | 1704 | L348  | 0.88 | 0.80 | 597  |
| L027  | 0.67 | 0.32 | 1090 | L349  | 0.28 | 0.28 | 1884 |
| L028  | 0.44 | 0.20 | 1643 | L350  | 0.50 | 0.28 | 799  |
| L029  | 0.36 | 0.17 | 1095 | L351  | 0.54 | 0.33 | 1463 |
| L031  | 0.45 | 0.26 | 1638 | L352  | 0.86 | 0.77 | 910  |
| L033  | 0.26 | 0.14 | 1340 | L353  | 0.89 | 0.80 | 845  |
| L034  | 0.47 | 0.31 | 1144 | L355  | 0.94 | 0.83 | 759  |
| L035  | 0.70 | 0.47 | 912  | L356  | 0.96 | 0.90 | 766  |
| L036  | 0.46 | 0.23 | 1112 | L358  | 0.13 | 0.10 | 1978 |
| L037  | 0.51 | 0.29 | 1495 | L360  | 0.73 | 0.43 | 1082 |
| L039  | 0.48 | 0.21 | 1493 | L361  | 1.00 | 0.94 | 551  |
| L040  | 0.38 | 0.18 | 1770 | L362  | 0.62 | 0.22 | 1163 |
| L042  | 0.90 | 0.80 | 886  | L365  | 0.26 | 0.10 | 1592 |
| L043  | 0.59 | 0.51 | 1014 | L366  | 0.43 | 0.32 | 1196 |
| L044  | 0.19 | 0.10 | 1556 | L369  | 0.87 | 0.80 | 1016 |
| L046  | 0.73 | 0.50 | 1219 | L371  | 0.06 | 0.04 | 1597 |
| L049  | 0.31 | 0.19 | 1635 | L373  | 0.46 | 0.20 | 1113 |
| L050  | 1.00 | 0.92 | 582  | L374  | 0.20 | 0.12 | 1459 |
| L051  | 0.35 | 0.21 | 1591 | L375  | 0.93 | 0.83 | 1140 |
| L054  | 0.73 | 0.20 | 1254 | L380  | 0.78 | 0.38 | 947  |
| L055  | 0.28 | 0.16 | 1833 | L383  | 0.58 | 0.23 | 1105 |
| L057  | 0.25 | 0.22 | 1783 | L384  | 0.23 | 0.13 | 1195 |
| L058  | 0.97 | 0.84 | 692  | L386  | 0.25 | 0.11 | 1052 |
| L060  | 0.94 | 0.89 | 629  | L387  | 0.58 | 0.40 | 1195 |
| L061  | 0.62 | 0.43 | 1223 | L388  | 0.53 | 0.27 | 1063 |
| L065  | 0.04 | 0.02 | 1767 | L389  | 0.86 | 0.68 | 922  |
| L068  | 0.59 | 0.27 | 1377 | L390  | 0.88 | 0.84 | 960  |

**Table S1.** List of 347 soybean lines and the evaluation of GR, NSR and EC in two environments JP14 and HY15.

| lines | JP14 |      |      | lines | JP14 |      |      |
|-------|------|------|------|-------|------|------|------|
|       | GR   | NSR  | EC   |       | GR   | NSR  | EC   |
| L071  | 0.71 | 0.57 | 1099 | L392  | 0.92 | 0.86 | 1450 |
| L074  | 0.93 | 0.64 | 749  | L394  | 0.62 | 0.28 | 770  |
| L075  | 0.83 | 0.38 | 1106 | L395  | 0.71 | 0.65 | 977  |
| L076  | 0.11 | 0.10 | 1553 | L397  | 0.42 | 0.20 | 1515 |
| L077  | 0.22 | 0.13 | 1127 | L400  | 0.82 | 0.64 | 2236 |
| L080  | 0.28 | 0.17 | 1378 | L401  | 0.15 | 0.12 | 2179 |
| L085  | 0.98 | 0.50 | 620  | L402  | 0.02 | 0.00 | 2175 |
| L086  | 0.90 | 0.84 | 712  | L404  | 0.22 | 0.17 | 1754 |
| L088  | 0.51 | 0.45 | 1274 | L405  | 0.84 | 0.24 | 1444 |
| L089  | 0.85 | 0.71 | 912  | L406  | 0.67 | 0.27 | 1283 |
| L090  | 0.40 | 0.35 | 1029 | L408  | 0.26 | 0.17 | 1796 |
| L093  | 0.24 | 0.14 | 1478 | L409  | 0.18 | 0.12 | 1678 |
| L094  | 0.62 | 0.54 | 1274 | L413  | 0.88 | 0.72 | 676  |
| L095  | 0.76 | 0.45 | 923  | L414  | 0.13 | 0.10 | 2010 |
| L096  | 0.61 | 0.42 | 1135 | L415  | 0.72 | 0.59 | 791  |
| L098  | 0.78 | 0.55 | 1202 | L416  | 0.78 | 0.56 | 1565 |
| L103  | 0.81 | 0.56 | 968  | L418  | 0.13 | 0.12 | 1680 |
| L104  | 0.92 | 0.71 | 925  | L419  | 0.24 | 0.15 | 1289 |
| L105  | 0.42 | 0.21 | 1313 | L420  | 0.80 | 0.62 | 971  |
| L106  | 0.91 | 0.42 | 1163 | L422  | 0.96 | 0.93 | 830  |
| L107  | 0.86 | 0.43 | 901  | L423  | 0.98 | 0.71 | 880  |
| L109  | 0.32 | 0.13 | 1046 | L425  | 0.63 | 0.46 | 521  |
| L110  | 0.67 | 0.46 | 1221 | L427  | 0.75 | 0.58 | 1003 |
| L111  | 0.33 | 0.17 | 1318 | L429  | 0.40 | 0.19 | 1180 |
| L115  | 0.89 | 0.87 | 904  | L430  | 0.94 | 0.88 | 946  |
| L116  | 0.32 | 0.21 | 1325 | L431  | 0.70 | 0.64 | 833  |
| L117  | 0.29 | 0.18 | 1333 | L433  | 0.57 | 0.27 | 809  |
| L123  | 0.59 | 0.35 | 1128 | L435  | 0.84 | 0.76 | 849  |
| L124  | 0.50 | 0.37 | 1162 | L437  | 0.14 | 0.13 | 1571 |
| L126  | 0.17 | 0.10 | 1945 | L438  | 0.92 | 0.61 | 728  |
| L127  | 0.33 | 0.17 | 1615 | L441  | 0.15 | 0.11 | 1842 |
| L128  | 0.55 | 0.23 | 1602 | L442  | 0.55 | 0.39 | 1596 |
| L129  | 0.36 | 0.22 | 992  | L443  | 0.00 | 0.00 | 2840 |
| L131  | 0.85 | 0.84 | 1006 | L445  | 0.72 | 0.71 | 797  |
| L133  | 0.23 | 0.15 | 1860 | L447  | 0.58 | 0.40 | 1171 |
| L134  | 0.33 | 0.13 | 1254 | L449  | 0.80 | 0.35 | 1196 |
| L135  | 0.43 | 0.31 | 999  | L452  | 0.45 | 0.19 | 1744 |
| L136  | 0.33 | 0.10 | 1847 | L453  | 0.18 | 0.10 | 1699 |
| L137  | 0.46 | 0.19 | 1510 | L455  | 0.29 | 0.15 | 1294 |
| L138  | 0.82 | 0.70 | 867  | L456  | 0.82 | 0.21 | 1556 |
| L140  | 0.90 | 0.87 | 759  | L457  | 0.18 | 0.00 | 2012 |
| L141  | 0.21 | 0.12 | 1464 | L462  | 0.73 | 0.37 | 1487 |
| L143  | 0.96 | 0.94 | 1154 | L464  | 0.91 | 0.73 | 983  |
| L144  | 0.34 | 0.19 | 1261 | L465  | 0.57 | 0.20 | 1506 |

**Table S1.** List of 347 soybean lines and the evaluation of GR, NSR and EC in two environments JP14 and HY15.

| lines       | JP14 |      |      | lines       | JP14 |      |      |
|-------------|------|------|------|-------------|------|------|------|
|             | GR   | NSR  | EC   |             | GR   | NSR  | EC   |
| <b>L149</b> | 0.87 | 0.74 | 945  | <b>L466</b> | 0.79 | 0.51 | 836  |
| <b>L152</b> | 0.15 | 0.12 | 1625 | <b>L467</b> | 0.70 | 0.57 | 1081 |
| <b>L153</b> | 0.12 | 0.12 | 1458 | <b>L468</b> | 0.92 | 0.83 | 884  |
| <b>L154</b> | 0.46 | 0.19 | 1582 | <b>L470</b> | 0.38 | 0.16 | 1288 |
| <b>L158</b> | 0.02 | 0.00 | 2318 | <b>L473</b> | 0.37 | 0.00 | 1022 |
| <b>L159</b> | 0.47 | 0.39 | 1197 | <b>L476</b> | 0.51 | 0.46 | 453  |
| <b>L161</b> | 0.19 | 0.10 | 1497 | <b>L477</b> | 0.56 | 0.10 | 1175 |
| <b>L165</b> | 0.90 | 0.84 | 814  | <b>L479</b> | 0.51 | 0.28 | 1247 |
| <b>L167</b> | 0.38 | 0.11 | 1107 | <b>L482</b> | 0.41 | 0.38 | 1281 |
| <b>L169</b> | 0.65 | 0.49 | 1063 | <b>L483</b> | 0.29 | 0.16 | 1394 |
| <b>L171</b> | 0.85 | 0.79 | 712  | <b>L487</b> | 0.23 | 0.19 | 1791 |
| <b>L172</b> | 0.69 | 0.53 | 1006 | <b>L488</b> | 0.97 | 0.85 | 619  |
| <b>L173</b> | 0.37 | 0.18 | 1494 | <b>L489</b> | 0.59 | 0.14 | 2250 |
| <b>L175</b> | 0.73 | 0.56 | 1186 | <b>L490</b> | 0.27 | 0.19 | 1360 |
| <b>L177</b> | 0.32 | 0.29 | 1284 | <b>L492</b> | 0.92 | 0.86 | 792  |
| <b>L178</b> | 0.26 | 0.16 | 1609 | <b>L493</b> | 0.48 | 0.30 | 1166 |
| <b>L180</b> | 0.49 | 0.18 | 906  | <b>L496</b> | 0.40 | 0.19 | 1249 |
| <b>L181</b> | 0.70 | 0.52 | 1016 | <b>L497</b> | 0.42 | 0.10 | 1529 |
| <b>L183</b> | 0.92 | 0.81 | 966  | <b>L498</b> | 0.79 | 0.71 | 1302 |
| <b>L184</b> | 0.40 | 0.33 | 1100 | <b>L499</b> | 0.55 | 0.45 | 928  |
| <b>L186</b> | 0.52 | 0.46 | 1418 | <b>L500</b> | 0.48 | 0.19 | 931  |
| <b>L189</b> | 0.62 | 0.45 | 940  | <b>L501</b> | 0.69 | 0.62 | 804  |
| <b>L191</b> | 0.43 | 0.35 | 983  | <b>L503</b> | 0.88 | 0.65 | 693  |
| <b>L195</b> | 0.90 | 0.84 | 992  | <b>L505</b> | 0.53 | 0.48 | 1144 |
| <b>L196</b> | 0.03 | 0.00 | 2095 | <b>L509</b> | 0.63 | 0.47 | 850  |
| <b>L203</b> | 0.95 | 0.89 | 719  | <b>L510</b> | 0.95 | 0.94 | 812  |
| <b>L204</b> | 0.60 | 0.42 | 1010 | <b>L511</b> | 0.92 | 0.90 | 681  |
| <b>L206</b> | 0.14 | 0.10 | 1566 | <b>L512</b> | 0.75 | 0.56 | 923  |
| <b>L208</b> | 0.32 | 0.13 | 2700 | <b>L514</b> | 0.70 | 0.10 | 1400 |
| <b>L209</b> | 0.24 | 0.10 | 1861 | <b>L518</b> | 0.41 | 0.34 | 935  |
| <b>L210</b> | 0.66 | 0.54 | 1247 | <b>L520</b> | 0.38 | 0.30 | 1027 |
| <b>L212</b> | 0.92 | 0.84 | 649  | <b>L521</b> | 0.53 | 0.50 | 1614 |
| <b>L213</b> | 0.47 | 0.32 | 1556 | <b>L523</b> | 0.78 | 0.59 | 729  |
| <b>L214</b> | 0.89 | 0.46 | 713  | <b>L525</b> | 0.55 | 0.41 | 1318 |
| <b>L216</b> | 0.70 | 0.42 | 840  | <b>L526</b> | 0.27 | 0.16 | 1284 |
| <b>L217</b> | 0.11 | 0.00 | 2049 | <b>L527</b> | 0.87 | 0.88 | 490  |
| <b>L223</b> | 0.12 | 0.10 | 1805 | <b>L528</b> | 0.89 | 0.79 | 473  |
| <b>L224</b> | 0.12 | 0.10 | 1854 | <b>L530</b> | 0.22 | 0.18 | 1650 |
| <b>L228</b> | 0.75 | 0.42 | 988  | <b>L531</b> | 0.84 | 0.76 | 1158 |
| <b>L230</b> | 0.08 | 0.00 | 2580 | <b>L532</b> | 0.36 | 0.18 | 1178 |
| <b>L233</b> | 0.87 | 0.76 | 946  | <b>L533</b> | 0.37 | 0.24 | 1458 |
| <b>L234</b> | 0.30 | 0.12 | 1353 | <b>L534</b> | 0.61 | 0.56 | 1795 |
| <b>L237</b> | 0.79 | 0.63 | 989  | <b>L537</b> | 0.28 | 0.11 | 1476 |
| <b>L239</b> | 0.81 | 0.80 | 1140 | <b>L539</b> | 0.43 | 0.10 | 1901 |

**Table S1.** List of 347 soybean lines and the evaluation of GR, NSR and EC in two environments JP14 and HY15.

| lines | JP14 |      |      | lines | JP14 |      |      |
|-------|------|------|------|-------|------|------|------|
|       | GR   | NSR  | EC   |       | GR   | NSR  | EC   |
| L240  | 0.59 | 0.42 | 1411 | L540  | 0.00 | 0.00 | 2475 |
| L242  | 0.84 | 0.65 | 805  | L542  | 0.26 | 0.17 | 2194 |
| L243  | 0.89 | 0.73 | 925  | L543  | 0.21 | 0.15 | 1267 |
| L245  | 0.45 | 0.30 | 1329 | L544  | 0.19 | 0.15 | 2120 |
| L247  | 0.78 | 0.51 | 846  | L548  | 0.94 | 0.76 | 823  |
| L248  | 0.62 | 0.36 | 1629 | L549  | 0.82 | 0.53 | 1210 |
| L250  | 0.55 | 0.37 | 1609 | L551  | 0.85 | 0.69 | 922  |
| L251  | 0.30 | 0.18 | 1644 | L552  | 0.55 | 0.15 | 1204 |
| L252  | 0.95 | 0.66 | 777  | L555  | 0.76 | 0.69 | 982  |
| L253  | 0.87 | 0.60 | 744  | L558  | 0.70 | 0.59 | 1472 |
| L254  | 0.67 | 0.56 | 1569 | L559  | 0.57 | 0.35 | 795  |
| L255  | 0.73 | 0.48 | 1874 | L560  | 0.62 | 0.40 | 1952 |
| L257  | 0.62 | 0.45 | 1494 | L561  | 0.73 | 0.63 | 1060 |
| L259  | 0.62 | 0.50 | 1114 | L562  | 0.89 | 0.59 | 994  |
| L260  | 0.08 | 0.04 | 1839 | L563  | 0.67 | 0.39 | 1166 |
| L262  | 0.76 | 0.65 | 866  | L569  | 0.72 | 0.64 | 1079 |
| L263  | 0.97 | 0.77 | 354  | L570  | 0.45 | 0.34 | 1463 |
| L266  | 0.27 | 0.20 | 1472 | L571  | 0.83 | 0.71 | 951  |
| L267  | 0.67 | 0.52 | 1414 | L572  | 0.52 | 0.46 | 1004 |
| L268  | 0.39 | 0.19 | 1328 | L573  | 0.17 | 0.06 | 1467 |
| L269  | 0.27 | 0.13 | 1200 | L574  | 0.73 | 0.41 | 1112 |
| L274  | 0.24 | 0.12 | 2000 | L576  | 0.60 | 0.53 | 984  |
| L275  | 0.96 | 0.79 | 1120 | L577  | 0.47 | 0.10 | 1482 |
| L277  | 0.26 | 0.11 | 1889 | L579  | 0.45 | 0.25 | 962  |
| L278  | 0.64 | 0.40 | 839  | L580  | 0.92 | 0.80 | 488  |
| L280  | 0.15 | 0.00 | 2255 | L582  | 0.55 | 0.19 | 1582 |
| L281  | 1.00 | 0.81 | 514  | L583  | 0.85 | 0.58 | 926  |
| L282  | 0.42 | 0.12 | 1401 | L584  | 0.42 | 0.34 | 1662 |
| L285  | 0.71 | 0.61 | 916  | L586  | 0.32 | 0.21 | 1479 |
| L286  | 0.68 | 0.53 | 1187 | L589  | 0.03 | 0.00 | 2230 |
| L288  | 0.17 | 0.12 | 1387 | L590  | 0.43 | 0.22 | 1334 |
| L289  | 0.89 | 0.73 | 997  | L591  | 0.58 | 0.19 | 866  |
| L295  | 0.18 | 0.10 | 1258 | L593  | 0.12 | 0.11 | 1576 |
| L299  | 0.65 | 0.41 | 1105 | L595  | 0.32 | 0.12 | 1481 |
| L300  | 0.72 | 0.51 | 1437 | L597  | 0.32 | 0.35 | 1599 |
| L303  | 0.65 | 0.60 | 1267 | L598  | 0.02 | 0.00 | 2390 |
| L306  | 0.75 | 0.53 | 1362 | L599  | 0.82 | 0.72 | 591  |
| L307  | 0.60 | 0.44 | 1254 | L600  | 0.62 | 0.27 | 1247 |
| L309  | 1.00 | 0.90 | 375  | L602  | 0.03 | 0.00 | 1958 |
| L311  | 0.70 | 0.40 | 905  | L605  | 0.57 | 0.43 | 1210 |
| L316  | 0.63 | 0.40 | 995  | L606  | 0.38 | 0.24 | 1849 |
| L317  | 0.38 | 0.31 | 1652 |       |      |      |      |

**Table S1.** List of 347 soybean lines and the evaluation of GR, NSR and EC in two environments JP14 and HY15.

| lines | HY15 |      |      | lines | HY15 |      |      |
|-------|------|------|------|-------|------|------|------|
|       | GR   | NSR  | EC   |       | GR   | NSR  | EC   |
| L001  | 0.12 | 0.04 | 1253 | L319  | 0.76 | 0.69 | 953  |
| L002  | 0.16 | 0.03 | 1237 | L320  | 0.73 | 0.61 | 1377 |
| L004  | 0.52 | 0.25 | 1491 | L322  | 0.06 | 0.03 | 1612 |
| L005  | 0.25 | 0.00 | 1089 | L323  | 0.13 | 0.08 | 1733 |
| L006  | 0.25 | 0.16 | 1349 | L324  | 0.48 | 0.44 | 1313 |
| L007  | 0.44 | 0.34 | 1125 | L325  | 0.46 | 0.32 | 1197 |
| L008  | 0.49 | 0.18 | 915  | L326  | 0.27 | 0.14 | 1465 |
| L009  | 0.26 | 0.14 | 1537 | L327  | 0.12 | 0.05 | 1453 |
| L010  | 0.32 | 0.03 | 1130 | L328  | 0.68 | 0.56 | 1271 |
| L014  | 0.18 | 0.02 | 1150 | L329  | 0.61 | 0.40 | 829  |
| L015  | 0.37 | 0.26 | 1189 | L332  | 0.40 | 0.19 | 1508 |
| L016  | 0.84 | 0.79 | 831  | L334  | 0.41 | 0.32 | 1079 |
| L018  | 0.94 | 0.92 | 228  | L336  | 0.48 | 0.28 | 1183 |
| L019  | 0.40 | 0.25 | 1522 | L338  | 0.21 | 0.20 | 1434 |
| L022  | 0.77 | 0.63 | 918  | L340  | 0.48 | 0.42 | 1135 |
| L023  | 0.38 | 0.22 | 1307 | L344  | 0.53 | 0.18 | 771  |
| L024  | 0.02 | 0.00 | 2295 | L347  | 0.51 | 0.27 | 805  |
| L026  | 0.25 | 0.25 | 3590 | L348  | 0.90 | 0.79 | 712  |
| L027  | 0.48 | 0.28 | 1566 | L349  | 0.09 | 0.03 | 2080 |
| L028  | 0.36 | 0.12 | 1319 | L350  | 0.44 | 0.26 | 838  |
| L029  | 0.14 | 0.00 | 1367 | L351  | 0.35 | 0.29 | 1670 |
| L031  | 0.23 | 0.03 | 1943 | L352  | 0.59 | 0.45 | 1030 |
| L033  | 0.32 | 0.13 | 1093 | L353  | 0.83 | 0.70 | 721  |
| L034  | 0.27 | 0.11 | 1289 | L355  | 0.74 | 0.59 | 848  |
| L035  | 0.40 | 0.34 | 1225 | L356  | 0.78 | 0.72 | 857  |
| L036  | 0.33 | 0.12 | 1261 | L358  | 0.05 | 0.01 | 1805 |
| L037  | 0.32 | 0.09 | 1573 | L360  | 0.52 | 0.21 | 1130 |
| L039  | 0.29 | 0.09 | 1723 | L361  | 0.94 | 0.90 | 494  |
| L040  | 0.28 | 0.01 | 1632 | L362  | 0.54 | 0.32 | 912  |
| L042  | 0.81 | 0.73 | 844  | L365  | 0.07 | 0.03 | 1824 |
| L043  | 0.55 | 0.43 | 928  | L366  | 0.23 | 0.12 | 1174 |
| L044  | 0.06 | 0.02 | 1467 | L369  | 0.77 | 0.50 | 1118 |
| L046  | 0.55 | 0.31 | 1369 | L371  | 0.18 | 0.00 | 1740 |
| L049  | 0.19 | 0.01 | 1507 | L373  | 0.16 | 0.06 | 1307 |
| L050  | 0.95 | 0.93 | 640  | L374  | 0.00 | 0.00 | 1609 |
| L051  | 0.24 | 0.03 | 1636 | L375  | 0.69 | 0.56 | 1424 |
| L054  | 0.28 | 0.28 | 1761 | L380  | 0.46 | 0.29 | 1153 |
| L055  | 0.28 | 0.25 | 1594 | L383  | 0.51 | 0.22 | 972  |
| L057  | 0.17 | 0.04 | 1648 | L384  | 0.18 | 0.01 | 1201 |
| L058  | 0.77 | 0.63 | 743  | L386  | 0.08 | 0.02 | 1162 |
| L060  | 0.76 | 0.67 | 785  | L387  | 0.46 | 0.27 | 1071 |
| L061  | 0.54 | 0.24 | 1315 | L388  | 0.48 | 0.21 | 989  |
| L065  | 0.20 | 0.14 | 1855 | L389  | 0.58 | 0.46 | 1031 |
| L068  | 0.46 | 0.07 | 1290 | L390  | 0.85 | 0.74 | 1041 |

**Table S1.** List of 347 soybean lines and the evaluation of GR, NSR and EC in two environments JP14 and HY15.

| lines | HY15 |      |      | lines | HY15 |      |      |
|-------|------|------|------|-------|------|------|------|
|       | GR   | NSR  | EC   |       | GR   | NSR  | EC   |
| L071  | 0.88 | 0.86 | 830  | L392  | 0.82 | 0.69 | 1217 |
| L074  | 0.83 | 0.57 | 952  | L394  | 0.46 | 0.29 | 961  |
| L075  | 0.59 | 0.28 | 1373 | L395  | 0.60 | 0.34 | 886  |
| L076  | 0.04 | 0.00 | 1730 | L397  | 0.36 | 0.12 | 1324 |
| L077  | 0.03 | 0.00 | 1369 | L400  | 0.14 | 0.06 | 1788 |
| L080  | 0.22 | 0.08 | 1250 | L401  | 0.02 | 0.00 | 2225 |
| L085  | 0.78 | 0.41 | 519  | L402  | 0.20 | 0.08 | 2043 |
| L086  | 0.91 | 0.83 | 783  | L404  | 0.00 | 0.00 | 1995 |
| L088  | 0.48 | 0.16 | 1033 | L405  | 0.32 | 0.01 | 1385 |
| L089  | 0.88 | 0.60 | 625  | L406  | 0.41 | 0.23 | 1394 |
| L090  | 0.31 | 0.14 | 872  | L408  | 0.08 | 0.03 | 1845 |
| L093  | 0.14 | 0.02 | 1695 | L409  | 0.12 | 0.00 | 1535 |
| L094  | 0.59 | 0.42 | 1185 | L413  | 0.35 | 0.26 | 880  |
| L095  | 0.53 | 0.24 | 1077 | L414  | 0.05 | 0.00 | 1547 |
| L096  | 0.58 | 0.32 | 973  | L415  | 0.73 | 0.65 | 595  |
| L098  | 0.78 | 0.51 | 1043 | L416  | 0.52 | 0.34 | 1660 |
| L103  | 0.44 | 0.21 | 1365 | L418  | 0.07 | 0.00 | 1475 |
| L104  | 0.86 | 0.63 | 736  | L419  | 0.03 | 0.00 | 1439 |
| L105  | 0.38 | 0.13 | 1043 | L420  | 0.64 | 0.42 | 1186 |
| L106  | 0.31 | 0.11 | 1567 | L422  | 0.89 | 0.68 | 920  |
| L107  | 0.79 | 0.31 | 769  | L423  | 0.77 | 0.69 | 970  |
| L109  | 0.23 | 0.03 | 1149 | L425  | 0.59 | 0.36 | 642  |
| L110  | 0.43 | 0.13 | 1680 | L427  | 0.51 | 0.35 | 1189 |
| L111  | 0.31 | 0.29 | 1398 | L429  | 0.14 | 0.00 | 1421 |
| L115  | 0.33 | 0.34 | 1695 | L430  | 0.82 | 0.66 | 1007 |
| L116  | 0.25 | 0.25 | 3620 | L431  | 0.79 | 0.74 | 925  |
| L117  | 0.71 | 0.39 | 1160 | L433  | 0.36 | 0.04 | 1018 |
| L123  | 0.32 | 0.28 | 1962 | L435  | 0.81 | 0.72 | 884  |
| L124  | 0.28 | 0.18 | 1492 | L437  | 0.06 | 0.04 | 1493 |
| L126  | 0.06 | 0.00 | 1675 | L438  | 0.82 | 0.58 | 686  |
| L127  | 0.22 | 0.12 | 1430 | L441  | 0.01 | 0.00 | 1760 |
| L128  | 0.21 | 0.12 | 1915 | L442  | 0.33 | 0.26 | 1450 |
| L129  | 0.32 | 0.14 | 1105 | L443  | 0.17 | 0.10 | 2590 |
| L131  | 0.77 | 0.58 | 1190 | L445  | 0.66 | 0.49 | 880  |
| L133  | 0.16 | 0.09 | 1650 | L447  | 0.52 | 0.16 | 947  |
| L134  | 0.33 | 0.06 | 1314 | L449  | 0.59 | 0.26 | 1255 |
| L135  | 0.20 | 0.06 | 1324 | L452  | 0.44 | 0.12 | 1498 |
| L136  | 0.11 | 0.05 | 2167 | L453  | 0.11 | 0.05 | 1530 |
| L137  | 0.46 | 0.32 | 1247 | L455  | 0.18 | 0.04 | 1151 |
| L138  | 0.71 | 0.58 | 1263 | L456  | 0.26 | 0.12 | 1660 |
| L140  | 0.92 | 0.64 | 1084 | L457  | 0.10 | 0.02 | 1830 |
| L141  | 0.02 | 0.00 | 1746 | L462  | 0.22 | 0.13 | 1562 |
| L143  | 0.86 | 0.73 | 1043 | L464  | 0.68 | 0.64 | 913  |
| L144  | 0.28 | 0.09 | 1390 | L465  | 0.37 | 0.17 | 1446 |

**Table S1.** List of 347 soybean lines and the evaluation of GR, NSR and EC in two environments JP14 and HY15.

| lines | HY15 |      |      | lines | HY15 |      |      |
|-------|------|------|------|-------|------|------|------|
|       | GR   | NSR  | EC   |       | GR   | NSR  | EC   |
| L149  | 0.61 | 0.49 | 1181 | L466  | 0.71 | 0.49 | 788  |
| L152  | 0.03 | 0.00 | 1719 | L467  | 0.48 | 0.30 | 1219 |
| L153  | 0.14 | 0.04 | 1507 | L468  | 0.81 | 0.72 | 814  |
| L154  | 0.24 | 0.11 | 1745 | L470  | 0.32 | 0.13 | 1059 |
| L158  | 0.04 | 0.02 | 2470 | L473  | 0.28 | 0.14 | 989  |
| L159  | 0.24 | 0.11 | 1458 | L476  | 0.86 | 0.69 | 442  |
| L161  | 0.03 | 0.00 | 1805 | L477  | 0.09 | 0.01 | 1190 |
| L165  | 0.87 | 0.77 | 703  | L479  | 0.26 | 0.04 | 1405 |
| L167  | 0.28 | 0.03 | 1125 | L482  | 0.34 | 0.13 | 1160 |
| L169  | 0.43 | 0.27 | 1248 | L483  | 0.19 | 0.04 | 1218 |
| L171  | 0.61 | 0.50 | 1085 | L487  | 0.21 | 0.10 | 1437 |
| L172  | 0.56 | 0.49 | 1134 | L488  | 0.86 | 0.78 | 643  |
| L173  | 0.35 | 0.09 | 1225 | L489  | 0.38 | 0.04 | 1995 |
| L175  | 0.58 | 0.53 | 1294 | L490  | 0.20 | 0.00 | 1216 |
| L177  | 0.27 | 0.17 | 1092 | L492  | 0.78 | 0.74 | 1009 |
| L178  | 0.19 | 0.08 | 1519 | L493  | 0.33 | 0.26 | 1085 |
| L180  | 0.44 | 0.12 | 1055 | L496  | 0.32 | 0.19 | 1189 |
| L181  | 0.83 | 0.76 | 1307 | L497  | 0.00 | 0.00 | 1638 |
| L183  | 0.86 | 0.63 | 1045 | L498  | 0.69 | 0.53 | 1259 |
| L184  | 0.27 | 0.14 | 1309 | L499  | 0.30 | 0.13 | 1030 |
| L186  | 0.38 | 0.30 | 1177 | L500  | 0.21 | 0.07 | 1078 |
| L189  | 0.49 | 0.26 | 1153 | L501  | 0.59 | 0.31 | 813  |
| L191  | 0.35 | 0.26 | 997  | L503  | 0.61 | 0.37 | 795  |
| L195  | 0.72 | 0.66 | 1380 | L505  | 0.28 | 0.09 | 1145 |
| L196  | 0.18 | 0.10 | 2315 | L509  | 0.58 | 0.39 | 765  |
| L203  | 0.91 | 0.79 | 869  | L510  | 0.73 | 0.64 | 931  |
| L204  | 0.52 | 0.13 | 1399 | L511  | 0.84 | 0.72 | 732  |
| L206  | 0.07 | 0.02 | 1461 | L512  | 0.52 | 0.37 | 1039 |
| L208  | 0.23 | 0.07 | 2316 | L514  | 0.12 | 0.01 | 1244 |
| L209  | 0.00 | 0.00 | 1262 | L518  | 0.31 | 0.10 | 891  |
| L210  | 0.47 | 0.35 | 1621 | L520  | 0.42 | 0.19 | 930  |
| L212  | 0.74 | 0.64 | 936  | L521  | 0.14 | 0.02 | 1469 |
| L213  | 0.33 | 0.24 | 1477 | L523  | 0.49 | 0.29 | 921  |
| L214  | 0.79 | 0.47 | 1013 | L525  | 0.45 | 0.33 | 1208 |
| L216  | 0.52 | 0.24 | 1061 | L526  | 0.20 | 0.09 | 1143 |
| L217  | 0.06 | 0.02 | 2519 | L527  | 0.78 | 0.67 | 607  |
| L223  | 0.07 | 0.02 | 1680 | L528  | 0.82 | 0.56 | 617  |
| L224  | 0.00 | 0.00 | 2091 | L530  | 0.19 | 0.09 | 1470 |
| L228  | 0.47 | 0.19 | 1307 | L531  | 0.87 | 0.60 | 1059 |
| L230  | 0.14 | 0.02 | 2813 | L532  | 0.36 | 0.19 | 1069 |
| L233  | 0.61 | 0.46 | 1177 | L533  | 0.27 | 0.03 | 1520 |
| L234  | 0.28 | 0.02 | 1433 | L534  | 0.21 | 0.06 | 1550 |
| L237  | 0.72 | 0.56 | 1101 | L537  | 0.17 | 0.02 | 1313 |
| L239  | 0.59 | 0.56 | 1411 | L539  | 0.07 | 0.00 | 1672 |

**Table S1.** List of 347 soybean lines and the evaluation of GR, NSR and EC in two environments JP14 and HY15.

| lines | HY15 |      |      | lines | HY15 |      |      |
|-------|------|------|------|-------|------|------|------|
|       | GR   | NSR  | EC   |       | GR   | NSR  | EC   |
| L240  | 0.53 | 0.37 | 1517 | L540  | 0.22 | 0.16 | 1695 |
| L242  | 0.71 | 0.36 | 934  | L542  | 0.18 | 0.05 | 1870 |
| L243  | 0.59 | 0.51 | 1342 | L543  | 0.20 | 0.01 | 1148 |
| L245  | 0.27 | 0.08 | 1508 | L544  | 0.09 | 0.03 | 1892 |
| L247  | 0.70 | 0.56 | 735  | L548  | 0.81 | 0.72 | 940  |
| L248  | 0.41 | 0.29 | 1920 | L549  | 0.78 | 0.62 | 1054 |
| L250  | 0.39 | 0.28 | 1775 | L551  | 0.62 | 0.42 | 1073 |
| L251  | 0.32 | 0.06 | 1331 | L552  | 0.68 | 0.08 | 1064 |
| L252  | 0.74 | 0.62 | 1070 | L555  | 0.88 | 0.59 | 831  |
| L253  | 0.60 | 0.56 | 924  | L558  | 0.68 | 0.36 | 1179 |
| L254  | 0.61 | 0.48 | 1153 | L559  | 0.67 | 0.36 | 942  |
| L255  | 0.42 | 0.16 | 2190 | L560  | 0.28 | 0.16 | 2069 |
| L257  | 0.58 | 0.39 | 1610 | L561  | 0.54 | 0.37 | 1124 |
| L259  | 0.38 | 0.26 | 1570 | L562  | 0.68 | 0.60 | 821  |
| L260  | 0.12 | 0.04 | 2370 | L563  | 0.37 | 0.23 | 1310 |
| L262  | 0.71 | 0.47 | 959  | L569  | 0.70 | 0.28 | 935  |
| L263  | 0.76 | 0.54 | 453  | L570  | 0.48 | 0.32 | 1260 |
| L266  | 0.03 | 0.00 | 1915 | L571  | 0.82 | 0.67 | 814  |
| L267  | 0.58 | 0.42 | 1371 | L572  | 0.48 | 0.32 | 1101 |
| L268  | 0.28 | 0.07 | 1421 | L573  | 0.25 | 0.08 | 1255 |
| L269  | 0.47 | 0.35 | 1084 | L574  | 0.73 | 0.35 | 931  |
| L274  | 0.04 | 0.02 | 1601 | L576  | 0.32 | 0.20 | 1178 |
| L275  | 0.67 | 0.50 | 1481 | L577  | 0.15 | 0.08 | 1101 |
| L277  | 0.04 | 0.01 | 2205 | L579  | 0.37 | 0.21 | 907  |
| L278  | 0.54 | 0.28 | 895  | L580  | 0.88 | 0.79 | 617  |
| L280  | 0.19 | 0.06 | 1687 | L582  | 0.28 | 0.11 | 1820 |
| L281  | 0.66 | 0.63 | 760  | L583  | 0.62 | 0.51 | 1194 |
| L282  | 0.22 | 0.03 | 1895 | L584  | 0.14 | 0.03 | 1950 |
| L285  | 0.69 | 0.50 | 1163 | L586  | 0.31 | 0.13 | 1198 |
| L286  | 0.42 | 0.29 | 1539 | L589  | 0.23 | 0.04 | 1736 |
| L288  | 0.15 | 0.12 | 1273 | L590  | 0.44 | 0.28 | 1165 |
| L289  | 0.59 | 0.52 | 1292 | L591  | 0.39 | 0.11 | 1052 |
| L295  | 0.00 | 0.00 | 1597 | L593  | 0.02 | 0.00 | 1435 |
| L299  | 0.44 | 0.30 | 1367 | L595  | 0.23 | 0.10 | 1380 |
| L300  | 0.49 | 0.24 | 1755 | L597  | 0.48 | 0.11 | 1417 |
| L303  | 0.38 | 0.04 | 1595 | L598  | 0.02 | 0.00 | 2360 |
| L306  | 0.50 | 0.27 | 1571 | L599  | 0.77 | 0.61 | 708  |
| L307  | 0.79 | 0.66 | 1820 | L600  | 0.39 | 0.18 | 1715 |
| L309  | 0.95 | 0.92 | 519  | L602  | 0.21 | 0.04 | 2138 |
| L311  | 0.68 | 0.32 | 1072 | L605  | 0.63 | 0.37 | 965  |
| L316  | 0.41 | 0.31 | 1166 | L606  | 0.32 | 0.10 | 1765 |
| L317  | 0.29 | 0.13 | 1920 |       |      |      |      |



**Table S2.** Primers used in this study.

| Genes                            | Forward (5'-3')          | Reverse (5'-3')         | Purpose          |
|----------------------------------|--------------------------|-------------------------|------------------|
| qRT- <i>Glyma.13g241900</i>      | GTACCAAAGACTCAGAAGAA     | CTTCACCATAGTTATACACACT  | qRT-PCR          |
| qRT- <i>Glyma.13g243200</i>      | TGCTGATAGCTCCTCAAACCT    | AGAAATCTCCCTAGAAATCT    | qRT-PCR          |
| qRT- <i>Glyma.13g244800</i>      | TTCACCCTCCTTGCAACCC      | ATACCCGGATCCGTATCCTC    | qRT-PCR          |
| qRT- <i>Glyma.13g246200</i>      | ATGTGAAAGTGTCTCCTCGA     | GTGGTCGCTTCTCTAATCGT    | qRT-PCR          |
| qRT- <i>Glyma.13g246500</i>      | GGTGCAATTCAGAGGTCTCA     | ATCGTTGTTTGAGATTGGCT    | qRT-PCR          |
| qRT- <i>Glyma.13g247200</i>      | AATTCAAGAAGTGCCTGCAT     | GCTTAACGCAATCCCATCTT    | qRT-PCR          |
| qRT- <i>Glyma.13g248000</i>      | CTAACAGCGTGGCACGGCAC     | TTCAGCCACACCACCATCGT    | qRT-PCR          |
| qRT- <i>Glyma.13g248400</i>      | CTGCCATGTTTGTCAATCAC     | ACCACCATCGTCGTTTTCTG    | qRT-PCR          |
| qRT- <i>Glyma.13g249800</i>      | AAAGTACTACTGATTTTCGTTG   | TCGATGAAAGTTGAAGATGAC   | qRT-PCR          |
| qRT- <i>Actin11</i>              | ATGACCCAAATCATGTTTGAGACC | TCAGTTAGATCACGACCAGCGA  | qRT-PCR          |
| <i>Glyma.13g244800-cds</i>       | ATGCTACAAACTCCACTTCT     | TTAGCAATAAGCGATGCACT    | gene cloning     |
| <i>Glyma.13g246500-cds</i>       | ATGGAGGAGGAGAGCGAGTT     | CTAATTGCAACCAATCTCAC    | gene cloning     |
| <i>Glyma.13g248000-cds</i>       | ATGAGGAAGTGTGAGCTCTG     | TTAATCGGAGCCACCTTCTT    | gene cloning     |
| <i>Glyma.13g249800-cds</i>       | ATGGCTGAGGATTTTCAAGC     | CTACCTGCCAATGAGTGCGC    | gene cloning     |
| Promoter- <i>Glyma.13g244800</i> | GATAGCAGGTGAGACTCGTG     | TGTGTTAGTGGAAGGGAAAA    | promoter cloning |
| Promoter- <i>Glyma.13g246500</i> | ATTAAACATTCCACCCTCCA     | AGAGAATAGGTGATGCTAAGAAA | promoter cloning |
| Promoter- <i>Glyma.13g248000</i> | TTGCAATCTAAAAAACGCTC     | TTAAAGAATCTTGAATGATGG   | promoter cloning |
| Promoter- <i>Glyma.13g249800</i> | GCCAGTTTATTTAAACTTAAA    | GTTGGGGATGTAAGAAAGGT    | promoter cloning |
| <i>GmSFT</i>                     | AGCCACCATGCTCGAGAT       | TGCTCACCATCTCGAGTTAA    | vector           |
|                                  | GAGGAAGTGTGAGCTCTG       | TCGGAGCCACCTTCTTCAAC    | construction     |

**Table S3.** Analysis of variance (ANOVA) of GR and NSR among four lines under different times of flooding treatment.

| Trait | Time | NN88-48 | NN86-4 | Caidou No.5 | Youchu No.4 | F values             |                        |
|-------|------|---------|--------|-------------|-------------|----------------------|------------------------|
|       |      |         |        |             |             | Line                 | Treatment              |
| GR    | 0d   | 0.96    | 0.94   | 0.96        | 0.98        | 1.43 <sup>ns</sup>   | /                      |
|       | 2d   | 0.82    | 0.85   | 0.66        | 0.76        | 1.87 <sup>ns</sup>   | 43.14 <sup>***</sup>   |
|       | 3d   | 0.64    | 0.55   | 0.24        | 0.18        | 23.26 <sup>***</sup> | 627.49 <sup>***</sup>  |
|       | 4d   | 0.15    | 0.14   | 0.12        | 0.05        | 0.59 <sup>ns</sup>   | 1530.05 <sup>***</sup> |
|       | 5d   | 0.05    | 0.06   | 0.01        | 0           | 0.25 <sup>ns</sup>   | 2644.28 <sup>***</sup> |
|       | 6d   | 0       | 0.02   | 0           | 0           |                      | /                      |
|       | 7d   | 0       | 0      | 0           | 0           |                      | /                      |
| NSR   | 0d   | 0.92    | 0.94   | 0.88        | 0.90        | 1.69 <sup>ns</sup>   | /                      |
|       | 2d   | 0.80    | 0.73   | 0.62        | 0.54        | 2.15 <sup>ns</sup>   | 37.25 <sup>**</sup>    |
|       | 3d   | 0.56    | 0.34   | 0.08        | 0.12        | 34.53 <sup>***</sup> | 584.17 <sup>***</sup>  |
|       | 4d   | 0.10    | 0.14   | 0.02        | 0.02        | 0.76 <sup>ns</sup>   | 1729.05 <sup>***</sup> |
|       | 5d   | 0.02    | 0.04   | 0           | 0           | 0.48 <sup>ns</sup>   | 3014.36 <sup>***</sup> |
|       | 6d   | 0       | 0      | 0           | 0           |                      | /                      |
|       | 7d   | 0       | 0      | 0           | 0           |                      | /                      |

<sup>ns</sup> represents not significant; \*\* and \*\*\* represent significant at  $p < 0.01$  and  $p < 0.001$ .

**Table S4.** SNPs contained in the candidate region on Chr.13.

| SNP name             | Position(bp) | SNP name             | Position(bp) |
|----------------------|--------------|----------------------|--------------|
| <i>Gm13_34829402</i> | 34829402     | <i>Gm13_35286347</i> | 35286347     |
| <i>Gm13_34829465</i> | 34829465     | <i>Gm13_35324537</i> | 35324537     |
| <i>Gm13_34859160</i> | 34859160     | <i>Gm13_35564109</i> | 35564109     |
| <i>Gm13_34860528</i> | 34860528     | <i>Gm13_35564167</i> | 35564167     |
| <i>Gm13_34861311</i> | 34861311     | <i>Gm13_35568041</i> | 35568041     |
| <i>Gm13_34867304</i> | 34867304     | <i>Gm13_35607601</i> | 35607601     |
| <i>Gm13_34867557</i> | 34867557     | <i>Gm13_35648515</i> | 35648515     |
| <i>Gm13_34868051</i> | 34868051     | <i>Gm13_35648538</i> | 35648538     |
| <i>Gm13_34923404</i> | 34923404     | <i>Gm13_35648564</i> | 35648564     |
| <i>Gm13_34958471</i> | 34958471     | <i>Gm13_35648582</i> | 35648582     |
| <i>Gm13_34976382</i> | 34976382     | <i>Gm13_35655151</i> | 35655151     |
| <i>Gm13_34983680</i> | 34983680     | <i>Gm13_35671662</i> | 35671662     |
| <i>Gm13_35006976</i> | 35006976     | <i>Gm13_35671834</i> | 35671834     |
| <i>Gm13_35008195</i> | 35008195     | <i>Gm13_35690183</i> | 35690183     |
| <i>Gm13_35011421</i> | 35011421     | <i>Gm13_35776682</i> | 35776682     |
| <i>Gm13_35123596</i> | 35123596     | <i>Gm13_35776687</i> | 35776687     |
| <i>Gm13_35134648</i> | 35134648     | <i>Gm13_35776711</i> | 35776711     |
| <i>Gm13_35142844</i> | 35142844     | <i>Gm13_35826401</i> | 35826401     |
| <i>Gm13_35194077</i> | 35194077     |                      |              |

**Table S5.** Phenotypic data of three selected each seed-flooding tolerant and sensitive lines used in qRT-PCR and sequencing analysis.

| Tolerance | Line | GR   | NSR  | EC(us/ml) | Env. |
|-----------|------|------|------|-----------|------|
| Tolerant  | L018 | 0.96 | 0.90 | 154       | JP14 |
|           |      | 0.94 | 0.92 | 228       | HY15 |
|           | L422 | 0.96 | 0.93 | 830       | JP14 |
|           |      | 0.89 | 0.68 | 920       | HY15 |
|           | L488 | 0.97 | 0.85 | 619       | JP14 |
|           |      | 0.86 | 0.78 | 643       | HY15 |
| Sensitive | L217 | 0.11 | 0.00 | 2049      | JP14 |
|           |      | 0.06 | 0.02 | 2519      | HY15 |
|           | L230 | 0.08 | 0.00 | 2580      | JP14 |
|           |      | 0.14 | 0.02 | 2813      | HY15 |
|           | L260 | 0.08 | 0.04 | 1839      | JP14 |
|           |      | 0.12 | 0.04 | 2370      | HY15 |

Env., represents environment.

**Table S6.** Phenotypic correlations ( $r$ ) among GR, NSR and EC in two different environments.

| Trait | GR      | NSR     | EC      |
|-------|---------|---------|---------|
| GR    | 1       | 0.92**  | -0.66** |
| NSR   | 0.90**  | 1       | -0.58** |
| EC    | -0.72** | -0.68** | 1       |

GR, germination rate. NSR, normal seedling rate; The datapoints under and above the diagonal represent  $r$  values of Jiangpu 2014(JP14) and Huaiyin 2015(HY15), respectively; \*\* and \*\*\* indicates significant level at  $P<0.01$  and  $P<0.001$ .
